# Supplementary material
Source: Springer Nature journal article supplement (https://www.springermedizin.de/resource/supplementary/12939_2012_313_MOESM2_ESM.pdf/9550804)
Supplement: MOESM2 [file 9550804]

**Indigenous cancer patients ascertained**

(September 2010 to November 2011)

**(n= 318)**

**Excluded patients**

**(n= 46)**

Too ill=3

Not receiving treatment=14

Not a cancer case= 8

Self-identified as non-Indigenous=9

Deceased=11

Mental health issue= 1

**Eligible patients**

**(n=272)**

Patients  
Interviewed  
**(n=157)**

Patients  
Missed  
**(n=89)**

Patients  
Refused  
**(n=26)**
